# Supplementary material for: The Relationship between Insomnia and the Pathophysiology of Major Depressive Disorder: An Evaluation of a Broad Selection of Serum and Urine Biomarkers
Source: MDPI journal article supplement (doi:10.3390/ijms24098437), 2023-05-08
Supplement: s1 [file s1]

**Table S1.** Associations of insomnia severity and relevant covariates with levels of serum biomarkers.

| Biomarker level              | Unit of measurement | n   | Effect              | b       | b       |        | β     | p    | VIF   |
|------------------------------|---------------------|-----|---------------------|---------|---------|--------|-------|------|-------|
|                              |                     |     |                     |         | 95% CI  |        |       |      |       |
|                              |                     |     |                     |         | LL      | UL     |       |      |       |
| Immunologic                  |                     |     |                     |         |         |        |       |      |       |
| α1-antitrypsin               | mg/L                | 175 |                     |         |         |        |       |      |       |
|                              |                     |     | Insomnia severity   | -.717   | -7.121  | 5.686  | -.020 | .825 | 1.402 |
|                              |                     |     | Depression severity | .755    | -2.659  | 4.170  | .040  | .663 | 1.433 |
|                              |                     |     | Antidepressant use  | -3.457  | -51.358 | 44.444 | -.016 | .887 | 2.125 |
|                              |                     |     | Gender              | 18.049  | -8.856  | 44.954 | .103  | .187 | 1.061 |
|                              |                     |     | Age                 | -.964   | -2.195  | .267   | -.136 | .124 | 1.347 |
|                              |                     |     | Cohort of origin    | -15.318 | -51.873 | 21.237 | -.091 | .409 | 2.128 |
| Calprotectin <sup>a</sup>    | μg/mL               | 178 |                     |         |         |        |       |      |       |
|                              |                     |     | Insomnia severity   | .021    | -.020   | .062   | .091  | .311 | 1.402 |
|                              |                     |     | Depression severity | -.002   | -.025   | .020   | -.020 | .825 | 1.441 |
|                              |                     |     | Antidepressant use  | .232    | -.075   | .539   | .165  | .138 | 2.142 |
|                              |                     |     | Gender              | .014    | -.159   | .187   | .013  | .871 | 1.064 |
|                              |                     |     | Age                 | .001    | -.007   | .009   | .031  | .726 | 1.349 |
|                              |                     |     | Cohort of origin    | .115    | -.121   | .351   | .106  | .338 | 2.154 |
| cAMP                         | pmol/mL             | 176 |                     |         |         |        |       |      |       |
|                              |                     |     | Insomnia severity   | -.290   | -1.223  | .644   | -.050 | .541 | 1.400 |
|                              |                     |     | Depression severity | -.061   | -.569   | .447   | -.020 | .812 | 1.427 |
|                              |                     |     | Antidepressant use  | 1.464   | -5.547  | 8.475  | .042  | .681 | 2.139 |
|                              |                     |     | Gender              | -11.242 | -15.227 | -7.257 | -.397 | .000 | 1.067 |
|                              |                     |     | Age                 | .119    | -.065   | .303   | .102  | .204 | 1.340 |
|                              |                     |     | Cohort of origin    | .189    | -5.208  | 5.585  | .007  | .945 | 2.149 |
| Endothelin-1 <sup>a</sup>    | pg/mL               | 177 |                     |         |         |        |       |      |       |
|                              |                     |     | Insomnia severity   | -.019   | -.037   | -.002  | -.183 | .033 | 1.404 |
|                              |                     |     | Depression severity | .009    | -.001   | .019   | .161  | .065 | 1.446 |
|                              |                     |     | Antidepressant use  | -.013   | -.146   | .120   | -.021 | .846 | 2.140 |
|                              |                     |     | Gender              | -.065   | -.140   | .010   | -.126 | .091 | 1.063 |
|                              |                     |     | Age                 | .007    | .003    | .010   | .324  | .000 | 1.348 |
|                              |                     |     | Cohort of origin    | .104    | .002    | .207   | .212  | .046 | 2.149 |
| Myeloperoxidase <sup>a</sup> | ng/mL               | 178 |                     |         |         |        |       |      |       |
|                              |                     |     | Insomnia severity   | .010    | -.034   | .055   | .041  | .650 | 1.402 |
|                              |                     |     | Depression severity | .000    | -.024   | .024   | .000  | .996 | 1.441 |
|                              |                     |     | Antidepressant use  | .286    | -.051   | .622   | .186  | .095 | 2.142 |
|                              |                     |     | Gender              | -.006   | -.195   | .184   | -.005 | .953 | 1.064 |
|                              |                     |     | Age                 | -.004   | -.012   | .005   | -.074 | .400 | 1.349 |
|                              |                     |     | Cohort of origin    | .089    | -.170   | .348   | .075  | .499 | 2.154 |
| Resistin <sup>a</sup>        | ng/mL               | 178 |                     |         |         |        |       |      |       |
|                              |                     |     | Insomnia severity   | -.016   | -.045   | .013   | -.096 | .266 | 1.402 |
|                              |                     |     | Depression severity | -.007   | -.023   | .009   | -.077 | .377 | 1.441 |
|                              |                     |     | Antidepressant use  | .042    | -.175   | .259   | .040  | .703 | 2.142 |
|                              |                     |     | Gender              | .073    | -.049   | .196   | .088  | .238 | 1.064 |

|                          |       |     |                     |        |        |       |       |      |       |
|--------------------------|-------|-----|---------------------|--------|--------|-------|-------|------|-------|
| Thromboxane <sup>a</sup> | ng/mL | 178 | Age                 | -.009  | -.015  | -.004 | -.273 | .001 | 1.349 |
|                          |       |     | Cohort of origin    | -.009  | -.176  | .158  | -.012 | .912 | 2.154 |
|                          |       |     | Insomnia severity   | -.030  | -.109  | .049  | -.067 | .448 | 1.402 |
|                          |       |     | Depression severity | .001   | -.042  | .043  | .002  | .978 | 1.441 |
|                          |       |     | Antidepressant use  | .485   | -.108  | 1.078 | .176  | .109 | 2.142 |
|                          |       |     | Gender              | -.254  | -.588  | .080  | -.116 | .136 | 1.064 |
|                          |       |     | Age                 | -.012  | -.027  | .003  | -.134 | .124 | 1.349 |
|                          |       |     | Cohort of origin    | .349   | -.107  | .805  | .166  | .133 | 2.154 |
|                          |       |     | Insomnia severity   | -.018  | -.038  | .001  | -.166 | .062 | 1.406 |
|                          |       |     | Depression severity | .008   | -.002  | .019  | .141  | .116 | 1.437 |
| TNFαR2 <sup>a</sup>      | ng/mL | 177 | Antidepressant use  | .027   | -.119  | .172  | .039  | .719 | 2.140 |
|                          |       |     | Gender              | -.074  | -.156  | .008  | -.136 | .078 | 1.060 |
|                          |       |     | Age                 | .002   | -.002  | .006  | .079  | .362 | 1.346 |
|                          |       |     | Cohort of origin    | -.004  | -.116  | .108  | -.008 | .939 | 2.150 |
|                          |       |     | Insomnia severity   | -.123  | -.433  | .187  | -.070 | .435 | 1.418 |
|                          |       |     | Depression severity | .223   | .065   | .380  | .238  | .006 | 1.449 |
|                          |       |     | Antidepressant use  | .214   | -2.096 | 2.524 | .020  | .855 | 2.141 |
|                          |       |     | Gender              | -.854  | -2.022 | .314  | -.099 | .151 | 1.066 |
|                          |       |     | Age                 | .118   | .062   | .173  | .333  | .000 | 1.384 |
|                          |       |     | Cohort of origin    | -.555  | -2.378 | 1.268 | -.068 | .548 | 2.161 |
| Zonulin <sup>b</sup>     | ng/mL | 176 | Insomnia severity   | -.148  | -.725  | .430  | -.044 | .615 | 1.402 |
|                          |       |     | Depression severity | .029   | -.283  | .340  | .016  | .856 | 1.441 |
|                          |       |     | Antidepressant use  | .828   | -3.509 | 5.166 | .041  | .707 | 2.142 |
|                          |       |     | Gender              | -.161  | -2.606 | 2.285 | -.010 | .897 | 1.064 |
|                          |       |     | Age                 | .086   | -.027  | .198  | .130  | .134 | 1.349 |
|                          |       |     | Cohort of origin    | -1.787 | -5.123 | 1.549 | -.115 | .292 | 2.154 |
|                          |       |     | Insomnia severity   | -.225  | -.736  | .286  | -.077 | .386 | 1.402 |
|                          |       |     | Depression severity | .045   | -.230  | .321  | .029  | .745 | 1.441 |
|                          |       |     | Antidepressant use  | -.429  | -4.266 | 3.408 | -.024 | .826 | 2.142 |
|                          |       |     | Gender              | .343   | -1.821 | 2.506 | .024  | .755 | 1.064 |
| Neurotrophic<br>BDNF     | ng/mL | 178 | Age                 | .081   | -.018  | .180  | .140  | .109 | 1.349 |
|                          |       |     | Cohort of origin    | -1.976 | -4.927 | .976  | -.145 | .188 | 2.154 |
|                          |       |     | Insomnia severity   | -.225  | -.736  | .286  | -.077 | .386 | 1.402 |
|                          |       |     | Depression severity | .045   | -.230  | .321  | .029  | .745 | 1.441 |
|                          |       |     | Antidepressant use  | -.429  | -4.266 | 3.408 | -.024 | .826 | 2.142 |
|                          |       |     | Gender              | .343   | -1.821 | 2.506 | .024  | .755 | 1.064 |
|                          |       |     | Age                 | .081   | -.018  | .180  | .140  | .109 | 1.349 |
|                          |       |     | Cohort of origin    | -1.976 | -4.927 | .976  | -.145 | .188 | 2.154 |
|                          |       |     | Insomnia severity   | -.225  | -.736  | .286  | -.077 | .386 | 1.402 |
|                          |       |     | Depression severity | .045   | -.230  | .321  | .029  | .745 | 1.441 |
| BDNF free                | ng/mL | 178 | Antidepressant use  | -.429  | -4.266 | 3.408 | -.024 | .826 | 2.142 |
|                          |       |     | Gender              | .343   | -1.821 | 2.506 | .024  | .755 | 1.064 |
|                          |       |     | Age                 | .081   | -.018  | .180  | .140  | .109 | 1.349 |
|                          |       |     | Cohort of origin    | -1.976 | -4.927 | .976  | -.145 | .188 | 2.154 |
|                          |       |     | Insomnia severity   | -.225  | -.736  | .286  | -.077 | .386 | 1.402 |
|                          |       |     | Depression severity | .045   | -.230  | .321  | .029  | .745 | 1.441 |
|                          |       |     | Antidepressant use  | -.429  | -4.266 | 3.408 | -.024 | .826 | 2.142 |
|                          |       |     | Gender              | .343   | -1.821 | 2.506 | .024  | .755 | 1.064 |
|                          |       |     | Age                 | .081   | -.018  | .180  | .140  | .109 | 1.349 |
|                          |       |     | Cohort of origin    | -1.976 | -4.927 | .976  | -.145 | .188 | 2.154 |
| BDNF total               | ng/mL | 178 | Insomnia severity   | -.106  | -.617  | .406  | -.036 | .684 | 1.402 |
|                          |       |     | Depression severity | .068   | -.208  | .343  | .043  | .629 | 1.441 |
|                          |       |     | Antidepressant use  | .380   | -3.458 | 4.218 | .021  | .845 | 2.142 |
|                          |       |     | Gender              | .038   | -2.126 | 2.202 | .003  | .972 | 1.064 |
|                          |       |     | Age                 | .076   | -.024  | .175  | .131  | .134 | 1.349 |
|                          |       |     | Cohort of origin    | -1.420 | -4.372 | 1.533 | -.104 | .344 | 2.154 |
|                          |       |     | Insomnia severity   | -.106  | -.617  | .406  | -.036 | .684 | 1.402 |
|                          |       |     | Depression severity | .068   | -.208  | .343  | .043  | .629 | 1.441 |
|                          |       |     | Antidepressant use  | .380   | -3.458 | 4.218 | .021  | .845 | 2.142 |
|                          |       |     | Gender              | .038   | -2.126 | 2.202 | .003  | .972 | 1.064 |
| EGF                      | pg/mL | 177 | Age                 | .076   | -.024  | .175  | .131  | .134 | 1.349 |
|                          |       |     | Cohort of origin    | -1.420 | -4.372 | 1.533 | -.104 | .344 | 2.154 |
|                          |       |     | Insomnia severity   | -.106  | -.617  | .406  | -.036 | .684 | 1.402 |
|                          |       |     | Depression severity | .068   | -.208  | .343  | .043  | .629 | 1.441 |
|                          |       |     | Antidepressant use  | .380   | -3.458 | 4.218 | .021  | .845 | 2.142 |
|                          |       |     | Gender              | .038   | -2.126 | 2.202 | .003  | .972 | 1.064 |
|                          |       |     | Age                 | .076   | -.024  | .175  | .131  | .134 | 1.349 |
|                          |       |     | Cohort of origin    | -1.420 | -4.372 | 1.533 | -.104 | .344 | 2.154 |
|                          |       |     | Insomnia severity   | -.106  | -.617  | .406  | -.036 | .684 | 1.402 |
|                          |       |     | Depression severity | .068   | -.208  | .343  | .043  | .629 | 1.441 |

|                |                                 |        |     |                     |         |          |         |       |      |       |
|----------------|---------------------------------|--------|-----|---------------------|---------|----------|---------|-------|------|-------|
| Neuropeptide   | Substance P <sup>a</sup>        | pg/mL  | 175 | Insomnia severity   | -5.792  | -24.025  | 12.441  | -.056 | .531 | 1.424 |
|                |                                 |        |     | Depression severity | 4.173   | -5.637   | 13.984  | .076  | .402 | 1.468 |
|                |                                 |        |     | Antidepressant use  | 77.142  | -58.631  | 212.914 | .123  | .264 | 2.180 |
|                |                                 |        |     | Gender              | -36.102 | -111.968 | 39.764  | -.072 | .349 | 1.060 |
|                |                                 |        |     | Age                 | -2.582  | -6.063   | .899    | -.126 | .145 | 1.340 |
|                |                                 |        |     | Cohort of origin    | 119.375 | 14.808   | 223.943 | .247  | .026 | 2.179 |
|                |                                 |        |     |                     |         |          |         |       |      |       |
| Neuroendocrine | Cortisol <sup>b</sup>           | µg/dL  | 176 | Insomnia severity   | -.009   | -.031    | .013    | -.071 | .434 | 1.405 |
|                |                                 |        |     | Depression severity | .006    | -.006    | .018    | .084  | .361 | 1.435 |
|                |                                 |        |     | Antidepressant use  | -.048   | -.213    | .117    | -.064 | .566 | 2.134 |
|                |                                 |        |     | Gender              | .019    | -.075    | .114    | .032  | .686 | 1.082 |
|                |                                 |        |     | Age                 | .000    | -.005    | .004    | -.020 | .827 | 1.355 |
|                |                                 |        |     | Cohort of origin    | -.014   | -.141    | .113    | -.025 | .826 | 2.142 |
|                |                                 |        |     |                     |         |          |         |       |      |       |
| Metabolic      | Acetyl-L-carnitine <sup>a</sup> | ng/mL  | 178 | Insomnia severity   | .056    | -.404    | .517    | .019  | .809 | 1.405 |
|                |                                 |        |     | Depression severity | -.108   | -.357    | .141    | -.069 | .392 | 1.431 |
|                |                                 |        |     | Antidepressant use  | -2.017  | -5.359   | 1.324   | -.114 | .235 | 2.139 |
|                |                                 |        |     | Gender              | .144    | -1.804   | 2.093   | .010  | .884 | 1.061 |
|                |                                 |        |     | Age                 | -.107   | -.202    | -.013   | -.183 | .026 | 1.349 |
|                |                                 |        |     | Cohort of origin    | 3.247   | .564     | 5.930   | .238  | .018 | 2.147 |
|                |                                 |        |     |                     |         |          |         |       |      |       |
|                | Apolipoprotein A1               | mg/mL  | 177 | Insomnia severity   | .001    | -.021    | .023    | .006  | .942 | 1.399 |
|                |                                 |        |     | Depression severity | -.002   | -.014    | .010    | -.027 | .764 | 1.441 |
|                |                                 |        |     | Antidepressant use  | -.071   | -.235    | .094    | -.092 | .398 | 2.140 |
|                |                                 |        |     | Gender              | .145    | .052     | .238    | .236  | .002 | 1.064 |
|                |                                 |        |     | Age                 | .002    | -.003    | .006    | .060  | .486 | 1.347 |
|                |                                 |        |     | Cohort of origin    | -.071   | -.197    | .056    | -.120 | .272 | 2.150 |
|                |                                 |        |     |                     |         |          |         |       |      |       |
|                | Leptin <sup>a</sup>             | ng/mL  | 178 | Insomnia severity   | -.020   | -.083    | .044    | -.043 | .539 | 1.402 |
|                |                                 |        |     | Depression severity | .035    | .001     | .069    | .145  | .043 | 1.441 |
|                |                                 |        |     | Antidepressant use  | .525    | .049     | 1.001   | .189  | .031 | 2.142 |
|                |                                 |        |     | Gender              | 1.333   | 1.065    | 1.601   | .600  | .000 | 1.064 |
|                |                                 |        |     | Age                 | .016    | .004     | .029    | .179  | .010 | 1.349 |
|                |                                 |        |     | Cohort of origin    | .298    | -.068    | .664    | .140  | .110 | 2.154 |
|                |                                 |        |     |                     |         |          |         |       |      |       |
|                | Prolactin <sup>a</sup>          | µIU/mL | 178 | Insomnia severity   | .009    | -.030    | .048    | .036  | .653 | 1.402 |
|                |                                 |        |     |                     |         |          |         |       |      |       |

|                     |       |       |       |       |      |       |
|---------------------|-------|-------|-------|-------|------|-------|
| Depression severity | .001  | -.020 | .022  | .007  | .930 | 1.441 |
| Antidepressant use  | .311  | .019  | .604  | .210  | .037 | 2.142 |
| Gender              | .199  | .034  | .364  | .167  | .019 | 1.064 |
| Age                 | -.014 | -.022 | -.006 | -.289 | .000 | 1.349 |
| Cohort of origin    | .372  | .147  | .597  | .327  | .001 | 2.154 |

Note. BDNF = brain-derived neurotrophic factor; cAMP = cyclic adenosine monophosphate; EGF = epidermal growth factor; LL = lower limit; TNF $\alpha$ R2 = tumour necrosis factor  $\alpha$  receptor 2; UL = upper limit; VIF = variance inflation factor. A significant *b*-coefficient indicates the  $\beta$ -coefficient is also significant. *b* represents unstandardised regression coefficients;  $\beta$  indicates standardised regression coefficients.

<sup>a</sup> Ln-transformation was applied.

<sup>b</sup> Heteroscedasticity-adjusted confidence interval was computed.

**Table S2.** Associations of insomnia severity and relevant covariates with levels of urine biomarkers.

| Biomarker level             | Unit of measurement | n      | Effect                      | b     | b      |                   | β     | p     | VIF   |
|-----------------------------|---------------------|--------|-----------------------------|-------|--------|-------------------|-------|-------|-------|
|                             |                     |        |                             |       | 95% CI |                   |       |       |       |
|                             |                     |        |                             |       | LL     | UL                |       |       |       |
| Immunologic                 |                     |        |                             |       |        |                   |       |       |       |
| α1-antitrypsin <sup>a</sup> | μg/L                | 174    | Insomnia severity           | .025  | -.041  | .091              | .060  | .454  | 1.415 |
|                             |                     |        | Depression severity         | .018  | -.016  | .051              | .082  | .302  | 1.404 |
|                             |                     |        | Antidepressant use          | .106  | -.375  | .587              | .044  | .664  | 2.340 |
|                             |                     |        | Gender                      | .273  | .002   | .545              | .136  | .048  | 1.045 |
|                             |                     |        | Age                         | .003  | -.009  | .015              | .040  | .590  | 1.258 |
|                             |                     |        | Cohort of origin            | -.721 | -1.048 | -.393             | -.436 | .000  | 2.256 |
|                             |                     |        | Calprotectin <sup>a b</sup> | ng/mL | 174    | Insomnia severity | -.017 | -.119 | .084  |
| Depression severity         | .045                | -.007  | .096                        |       |        | .099              | .089  | 1.404 |       |
| Antidepressant use          | .017                | -.727  | .761                        |       |        | .003              | .963  | 2.340 |       |
| Gender                      | 2.825               | 2.379  | 3.271                       |       |        | .672              | .000  | 1.045 |       |
| Age                         | .008                | -.014  | .030                        |       |        | .049              | .454  | 1.258 |       |
| Cohort of origin            | -1.148              | -1.607 | -.690                       |       |        | -.333             | .000  | 2.256 |       |
| cGMP <sup>a</sup>           | pmol/mL             | 174    | Insomnia severity           |       |        | -.007             | -.045 | .031  | -.030 |
|                             |                     |        | Depression severity         | .011  | -.009  | .030              | .093  | .286  | 1.404 |
|                             |                     |        | Antidepressant use          | -.290 | -.569  | -.011             | -.231 | .042  | 2.340 |
|                             |                     |        | Gender                      | -.075 | -.232  | .083              | -.071 | .350  | 1.045 |
|                             |                     |        | Age                         | -.007 | -.014  | .000              | -.154 | .064  | 1.258 |
|                             |                     |        | Cohort of origin            | -.314 | -.505  | -.124             | -.361 | .001  | 2.256 |
|                             |                     |        | HVEM <sup>a</sup>           | ng/mL | 174    | Insomnia severity | -.010 | -.050 | .031  |
| Depression severity         | .011                | -.010  |                             |       |        | .032              | .088  | .306  | 1.404 |
| Antidepressant use          | -.110               | -.408  |                             |       |        | .188              | -.081 | .468  | 2.340 |
| Gender                      | -.254               | -.422  |                             |       |        | -.086             | -.221 | .003  | 1.045 |
| Age                         | -.007               | -.014  |                             |       |        | .001              | -.139 | .089  | 1.258 |
| Cohort of origin            | -.278               | -.481  |                             |       |        | -.075             | -.295 | .008  | 2.256 |
| Isoprostane-2 <sup>a</sup>  | ng/mL               | 173    |                             |       |        | Insomnia severity | .008  | -.035 | .051  |
|                             |                     |        | Depression severity         | .007  | -.015  | .029              | .053  | .545  | 1.408 |
|                             |                     |        | Antidepressant use          | .025  | -.291  | .341              | .018  | .874  | 2.339 |
|                             |                     |        | Gender                      | -.338 | -.517  | -.159             | -.279 | .000  | 1.042 |
|                             |                     |        | Age                         | -.009 | -.018  | -.001             | -.190 | .022  | 1.266 |
|                             |                     |        | Cohort of origin            | -.137 | -.353  | .078              | -.138 | .209  | 2.254 |
|                             |                     |        | Lipocalin-2 <sup>a</sup>    | ng/mL | 173    | Insomnia severity | .073  | -.018 | .164  |
| Depression severity         | .021                | -.025  |                             |       |        | .068              | .072  | .370  | 1.417 |
| Antidepressant use          | -.074               | -.738  |                             |       |        | .590              | -.022 | .827  | 2.337 |
| Gender                      | .743                | .367   |                             |       |        | 1.120             | .267  | .000  | 1.044 |

|                                          |       |     |                     |          |          |         |       |      |       |
|------------------------------------------|-------|-----|---------------------|----------|----------|---------|-------|------|-------|
| LTB4 <sup>a</sup>                        | pg/mL | 174 | Age                 | .004     | -.013    | .021    | .038  | .611 | 1.268 |
|                                          |       |     | Cohort of origin    | -.968    | -1.420   | -.515   | -.425 | .000 | 2.251 |
|                                          |       |     | Insomnia severity   | .001     | -.035    | .037    | .005  | .959 | 1.415 |
|                                          |       |     | Depression severity | .008     | -.010    | .027    | .078  | .383 | 1.404 |
|                                          |       |     | Antidepressant use  | -.255    | -.522    | .011    | -.217 | .060 | 2.340 |
|                                          |       |     | Gender              | -.195    | -.346    | -.045   | -.196 | .011 | 1.045 |
|                                          |       |     | Age                 | -.001    | -.008    | .006    | -.020 | .808 | 1.258 |
|                                          |       |     | Cohort of origin    | -.157    | -.338    | .025    | -.192 | .090 | 2.256 |
|                                          |       |     | Insomnia severity   | -.012    | -.079    | .055    | -.031 | .719 | 1.413 |
|                                          |       |     | Depression severity | .009     | -.025    | .043    | .046  | .596 | 1.397 |
| Resistin <sup>a</sup>                    | ng/mL | 173 | Antidepressant use  | -.148    | -.636    | .340    | -.067 | .550 | 2.337 |
|                                          |       |     | Gender              | -.295    | -.571    | -.018   | -.158 | .037 | 1.048 |
|                                          |       |     | Age                 | -.017    | -.029    | -.005   | -.222 | .008 | 1.263 |
|                                          |       |     | Cohort of origin    | -.442    | -.775    | -.110   | -.289 | .009 | 2.253 |
|                                          |       |     | Insomnia severity   | .003     | -.041    | .047    | .011  | .901 | 1.415 |
|                                          |       |     | Depression severity | .009     | -.014    | .032    | .066  | .438 | 1.404 |
|                                          |       |     | Antidepressant use  | -.022    | -.346    | .301    | -.015 | .892 | 2.340 |
|                                          |       |     | Gender              | -.349    | -.532    | -.167   | -.276 | .000 | 1.045 |
|                                          |       |     | Age                 | -.006    | -.015    | .002    | -.125 | .122 | 1.258 |
|                                          |       |     | Cohort of origin    | -.283    | -.504    | -.063   | -.273 | .012 | 2.256 |
| Thromboxane <sup>a</sup>                 | ng/mL | 174 | Insomnia severity   | .003     | -.041    | .047    | .011  | .901 | 1.415 |
|                                          |       |     | Depression severity | .009     | -.014    | .032    | .066  | .438 | 1.404 |
|                                          |       |     | Antidepressant use  | -.022    | -.346    | .301    | -.015 | .892 | 2.340 |
|                                          |       |     | Gender              | -.349    | -.532    | -.167   | -.276 | .000 | 1.045 |
|                                          |       |     | Age                 | -.006    | -.015    | .002    | -.125 | .122 | 1.258 |
|                                          |       |     | Cohort of origin    | -.283    | -.504    | -.063   | -.273 | .012 | 2.256 |
| Neurotrophic<br>EGF <sup>a</sup>         | ng/mL | 174 | Insomnia severity   | -.007    | -.048    | .034    | -.027 | .746 | 1.415 |
|                                          |       |     | Depression severity | .009     | -.012    | .030    | .072  | .385 | 1.404 |
|                                          |       |     | Antidepressant use  | -.023    | -.322    | .277    | -.016 | .881 | 2.340 |
|                                          |       |     | Gender              | -.088    | -.257    | .081    | -.074 | .305 | 1.045 |
|                                          |       |     | Age                 | -.019    | -.027    | -.012   | -.398 | .000 | 1.258 |
|                                          |       |     | Cohort of origin    | -.237    | -.441    | -.033   | -.242 | .023 | 2.256 |
| Midkine <sup>a b</sup>                   | pg/mL | 172 | Insomnia severity   | .025     | -.026    | .076    | .084  | .336 | 1.413 |
|                                          |       |     | Depression severity | .004     | -.021    | .029    | .025  | .760 | 1.408 |
|                                          |       |     | Antidepressant use  | -.147    | -.500    | .207    | -.088 | .414 | 2.338 |
|                                          |       |     | Gender              | -.634    | -.842    | -.426   | -.447 | .000 | 1.046 |
|                                          |       |     | Age                 | -.011    | -.020    | -.001   | -.184 | .030 | 1.271 |
|                                          |       |     | Cohort of origin    | -.067    | -.299    | .165    | -.058 | .569 | 2.253 |
| Neuropeptide<br>Substance P <sup>b</sup> | pg/mL | 170 | Insomnia severity   | -1.710   | -8.455   | 5.034   | -.038 | .617 | 1.416 |
|                                          |       |     | Depression severity | 2.896    | -.736    | 6.527   | .125  | .117 | 1.387 |
|                                          |       |     | Antidepressant use  | -43.715  | -112.676 | 25.247  | -.168 | .212 | 2.376 |
|                                          |       |     | Gender              | -32.718  | -62.808  | -2.628  | -.150 | .033 | 1.045 |
|                                          |       |     | Age                 | -.322    | -1.589   | .946    | -.037 | .617 | 1.263 |
|                                          |       |     | Cohort of origin    | -110.077 | -160.200 | -59.954 | -.618 | .000 | 2.303 |

|                                 |       |     |                     |       |       |       |       |      |       |
|---------------------------------|-------|-----|---------------------|-------|-------|-------|-------|------|-------|
| Neuroendocrine                  |       |     |                     |       |       |       |       |      |       |
| Aldosterone <sup>a</sup>        | ng/mL | 171 |                     |       |       |       |       |      |       |
|                                 |       |     | Insomnia severity   | .001  | -.044 | .046  | .004  | .965 | 1.403 |
|                                 |       |     | Depression severity | .003  | -.020 | .027  | .026  | .773 | 1.406 |
|                                 |       |     | Antidepressant use  | .142  | -.195 | .478  | .096  | .408 | 2.365 |
|                                 |       |     | Gender              | .093  | -.096 | .281  | .074  | .333 | 1.044 |
|                                 |       |     | Age                 | -.013 | -.021 | -.005 | -.257 | .003 | 1.256 |
|                                 |       |     | Cohort of origin    | .004  | -.224 | .232  | .004  | .970 | 2.278 |
| Cortisol <sup>a b</sup>         | µg/dL | 174 |                     |       |       |       |       |      |       |
|                                 |       |     | Insomnia severity   | .020  | -.038 | .078  | .064  | .508 | 1.415 |
|                                 |       |     | Depression severity | -.014 | -.040 | .013  | -.089 | .301 | 1.404 |
|                                 |       |     | Antidepressant use  | -.151 | -.610 | .308  | -.088 | .517 | 2.340 |
|                                 |       |     | Gender              | -.095 | -.323 | .134  | -.065 | .416 | 1.045 |
|                                 |       |     | Age                 | -.013 | -.023 | -.002 | -.211 | .015 | 1.258 |
|                                 |       |     | Cohort of origin    | -.036 | -.319 | .247  | -.031 | .799 | 2.256 |
| Metabolic                       |       |     |                     |       |       |       |       |      |       |
| Acetyl-L-carnitine <sup>a</sup> | ng/mL | 174 |                     |       |       |       |       |      |       |
|                                 |       |     | Insomnia severity   | -.048 | -.096 | .001  | -.168 | .055 | 1.415 |
|                                 |       |     | Depression severity | .032  | .007  | .057  | .219  | .012 | 1.404 |
|                                 |       |     | Antidepressant use  | .205  | -.150 | .561  | .128  | .256 | 2.340 |
|                                 |       |     | Gender              | -.153 | -.354 | .048  | -.113 | .134 | 1.045 |
|                                 |       |     | Age                 | -.001 | -.010 | .008  | -.009 | .909 | 1.258 |
|                                 |       |     | Cohort of origin    | -.117 | -.359 | .125  | -.105 | .342 | 2.256 |

Note. cGMP = cyclic guanosine monophosphate; EGF = epidermal growth factor; HVEM = herpes virus entry mediator; LL = lower limit; LTB4 = leukotriene B4; UL = upper limit; VIF = variance inflation factor. A significant *b*-coefficient indicates the  $\beta$ -coefficient is also significant. *b* represents unstandardised regression coefficients;  $\beta$  indicates standardised regression coefficients.

<sup>a</sup> Ln-transformation was applied.

<sup>b</sup> Heteroscedasticity-adjusted confidence interval was computed.

**Table S3.** Intra- and inter-assay reliability as reported by vendors of assay kits used for biomarker measurement.

| Biomarker              | Sample(s)       | Vendor                                                      | Intra-assay CV | Inter-assay CV |
|------------------------|-----------------|-------------------------------------------------------------|----------------|----------------|
| Immunologic            |                 |                                                             |                |                |
| $\alpha$ 1-antitrypsin | Serum and urine | Immundiagnostik GmbH, Bensheim, Germany                     | <8%            | <11%           |
| Calprotectin           | Serum and urine | Sanbio B, Hycult biotech, Uden, The Netherlands             | <6%            | <5%            |
| cAMP                   | Serum           | R&D systems Europe Ltd., Abingdon, United Kingdom           | <4%            | <9%            |
| cGMP                   | Urine           | R&D systems Europe Ltd., Abingdon, United Kingdom           | <7%            | <9%            |
| Endothelin-1           | Serum           | R&D systems Europe Ltd., Abingdon, United Kingdom           | <3%            | <7%            |
| HVEM                   | Urine           | Ray Biotech Inc., Norcross, GA, USA                         | <10%           | <12%           |
| Isoprostane-2          | Urine           | Northwest Life Science Specialties, LLC, Vancouver, WA, USA | U/A            | U/A            |
| Lipocalin-2            | Urine           | Ray Biotech Inc., Norcross, GA, USA                         | <10%           | <12%           |
| LTB4                   | Urine           | R&D systems Europe Ltd., Abingdon, United Kingdom           | <5%            | <9%            |
| Myeloperoxidase        | Serum           | R&D systems Europe Ltd., Abingdon, United Kingdom           | <3%            | <10%           |
| Resistin               | Serum and urine | R&D systems Europe Ltd., Abingdon, United Kingdom           | <5%            | <9%            |
| Thromboxane            | Serum and urine | R&D systems Europe Ltd., Abingdon, United Kingdom           | <6%            | <7%            |
| TNF $\alpha$ R2        | Serum           | Ray Biotech Inc., Norcross, GA, USA                         | <10%           | <12%           |
| Zonulin                | Serum           | Immundiagnostik GmbH, Bensheim, Germany                     | <5%            | <9%            |
| Neurotrophic           |                 |                                                             |                |                |
| BDNF                   | Serum           | Promega Benelux BV, Leiden, The Netherlands                 | U/A            | U/A            |
| BDNF free              | Serum           | Promega Benelux BV, Leiden, The Netherlands                 | U/A            | U/A            |
| BDNF total             | Serum           | Promega Benelux BV, Leiden, The Netherlands                 | U/A            | U/A            |
| EGF                    | Serum and urine | Ray Biotech Inc., Norcross, GA, USA                         | <10%           | <12%           |
| Midkine                | Urine           | Cellmid Limited, Perth, Australia                           | U/A            | U/A            |
| Neuropeptide           |                 |                                                             |                |                |
| Substance P            | Serum and urine | R&D systems Europe Ltd., Abingdon, United Kingdom           | <7%            | <12%           |
| Neuroendocrine         |                 |                                                             |                |                |
| Aldosterone            | Urine           | LDN, Germany                                                | <6%            | <8%            |
| Cortisol               | Serum and urine | R&D systems Europe Ltd., Abingdon, United Kingdom           | <7%            | <14%           |
| Metabolic              |                 |                                                             |                |                |
| Acetyl-L-carnitine     | Serum and urine | Abbexa Ltd, United Kingdom                                  | <10%           | <12%           |
| Apolipoprotein A1      | Serum           | R&D systems Europe Ltd., Abingdon, United Kingdom           | <4%            | <7%            |
| Leptin                 | Serum           | Ray Biotech Inc., Norcross, GA, USA                         | <10%           | <12%           |
| Prolactin              | Serum           | Diagnostics Biochem Canada Inc.                             | <10%           | <12%           |

Note. BDNF = brain-derived neurotrophic factor; cAMP = cyclic adenosine monophosphate; cGMP = cyclic guanosine monophosphate; EGF = epidermal growth factor; HVEM = herpes virus entry mediator; LTB4 = leukotriene B4; TNF $\alpha$ R2 = tumour necrosis factor  $\alpha$  receptor 2; U/A = unavailable.
